# Supplementary material
Source: Research Square preprint supplement (doi:10.21203/rs.3.rs-8940405/v1)
Supplement: Supplementary file 1 [file 39dd264dd26efb9d24098e1b.docx]

**Focus Group Discussion Guide**

1. You have been shown the information sheet and provided with basics on the PrEP ring - and have handled a model ring – probably for most of you the 1st time…

How do you feel about the ring adding value to the current tools for PrEP*?*

*2. W*hat questions or concerns do you have about the PrEP ring?

*Probe: How do you think clients would feel about the PrEP ring?*

*Probe: What are some positive and negative aspects.*

We have 2 questions in thinking about young women and the ring, once it becomes widely available.

3.What difficulties or barriers might young women face in **finding information** about the ring **?**

*Probe*: Can you foresee barriers from family, husband/partner, community, if so please expand?

*Probe*: Would/will stigma impact client’s abilities to seek the PrEP ring?

4. Now, once they learn about it and access it, what barriers or difficulties might young women have in **actually** **using** the ring.

*Probe*: Can you foresee barriers from family, husband/partner, community, if so please expand?

*Probe*: Would/will stigma impact client’s abilities to seek the PrEP ring?

5. What is the responsibility of health educators and health providers in informing young mothers –married or unmarried - about new methods of HIV prevention such as the PrEP ring?

*Probe: Are there special circumstances that warrant not sharing information?*

6. In your opinion, how might the attitudes of nurses, midwives and VHS workers about sexuality and using HIV prevention vary across personnel levels when counseling young, unmarried women? Would there be differences across these levels of personnel?

*Probe: How would their attitudes impact their sharing of information with unmarried women?*

7. What is the added value, if any, of peer counseling for young, unmarried women in PrEP services, including the ring?

8. What will be the biggest hurdle (or need) in getting the ring recommended by providers?

*Probe*: what programs will be needed **besides** information? Or is information enough?
