# Supplementary material
Source: Research Square preprint supplement (doi:10.21203/rs.3.rs-8940405/v1)
Supplement: Supplementary file 2 [file 8f1f2b43dd3f177a342da548.docx]

**Table 2. Illustrative quotes – select questions**

| **Questions** | **Themes** | **Illustrative Quotes** |
| --- | --- | --- |
| **“What questions or concerns do you have about the PrEP ring?”** | Health promotion and education challenges | “… Can’t the ring bring irritation to partners (spouses)? Isn’t it uncomfortable for men, can the men bring it out during sexual intercourse?” (**Nurse, female, 53 yrs)**  **“**… It is therefore important to know whether the ring is hormonal vs non-hormonal. Sometimes clients react to some of the hormonal methods.” (**CHW, female, 30 yrs)**  “My worry is the young women may fail to insert the ring because of the size. Those with STIs may also fear. Some people may fear that the ring may cause HPV.” **(Nurse, female, 28 yrs)** |
| **“What do you see as difficulties or barriers for young women to use or find information?”** | Structural /policy/legal considerations | “The school’s sexual and reproductive information is compromised by the government policy. The students are sexually active, but the policy doesn’t accept to talk about other HIV prevention methods except abstinence.” **(MW, female, 38 yrs)**  “ I see the distance from the community to health facilities as one of the barriers. This may require us health workers to bring services closer to the people especially those in hard-to-reach areas” **(Midwife, female, 34 yrs)** |
|  | Attitudinal barriers | “I once worked in a hospital which was under the Moslem community…they used to burn boxes of condoms because they looked at it as a family planning method. But since HIV is now rampant, some take it on once information is provided to them.” **(Nurse, female, 38 yrs)**  “… an adolescent came for family planning and the health worker picked the adolescent out of the line and told them that they are too young; this girl never came back for the service.” **(Nurse, female, 38 yrs)**  “Gender issues in African culture will be a barrier. Girls or women must be submissive. Sometimes the men may not allow the girls or women to access information. There will be a need to sensitize men about this method even before the women. Once men buy in, they will accept their girls and women to use the method.” **(Nurse, female, 50 yrs)**  “Regarding stigma, if someone isn’t well supported psychologically, they may feel that other people think that they have many sexual partners; this may result into stigma.” (**Nurse, female, 50 yrs)** |
| **“What are the responsibilities of health providers to inform young women?”** | Clinical considerations  Health promotion/education | “My responsibility is to give out any relevant information about the ring, do sensitization to the community members for them to be aware about the ring, [and] sensitize the men to minimize resistance.” (**MW, female, 38 yrs)**  “When I screen my client even they are at risk or not, I must continue giving the information about the HIV prevention methods. These people may be at risk at any point in time.” (**Nurse, male, 30 yrs)** |
| **“What is the biggest hurdle to get the ring recommended to young women?”** | Structural issues, constraints, resources | “My point is about the stock out because a person may move over 5KMs to take a service and if they don’t find it, clients may not come back.” (**MW, female, 34 yrs)**  “Me I think the other needs may include the equipment that we may need i.e., the gloves and other supplies that may be need during the insertion.” (**Nurse, female, 31 yrs)**  **“**… and the visual aids for providing the information.” (**Nurse**, **female, 46 yrs)**  **“**In Uganda, the community health workers are not paid, we don’t have transport and Uganda is a very hilly country. We will need transport to travel from house to house to inform people about the PrEP ring.” **(CHW, male, 50 yrs)**  “I think the need for training and refresher training such that the providers continue to be conversant with the message and method.” **(VHT/CHW, male, 48 yrs** |
